# Supplementary material for: Deciphering key features in protein structures with the new ENDscript server
Source: PubMed Central journal article supplement (PMC4086106; doi:10.1093/nar/gku316), 2014-04-21
Supplement: supp_gku316_nar-00222-web-b-2014-File006.pdf [file supp_gku316_nar-00222-web-b-2014-File006.pdf]

|        | 07   |    |    | β10 |    | 08 |    | η6 | η7 |    |    | η8 |
|--------|------|----|----|-----|----|----|----|----|----|----|----|----|
| 2CAH_A | 0000 | TT | TT | TT  | TT | TT | TT | TT | TT | TT | TT | TT |
| 1M85_A | 0000 | TT | TT | TT  | TT | TT | TT | TT | TT | TT | TT | TT |
| 1H7K_A | 0000 | TT | TT | TT  | TT | TT | TT | TT | TT | TT | TT | TT |
| 1H6N_A | 0000 | TT | TT | TT  | TT | TT | TT | TT | TT | TT | TT | TT |
| 1B93_A | 0000 | TT | TT | TT  | TT | TT | TT | TT | TT | TT | TT | TT |
| 3HB6_A | 0000 | TT | TT | TT  | TT | TT | TT | TT | TT | TT | TT | TT |
| 4E37_A | 0000 | TT | TT | TT  | TT | TT | TT | TT | TT | TT | TT | TT |
| 21S8_A | 0000 | TT | TT | TT  | TT | TT | TT | TT | TT | TT | TT | TT |
| 1QWL_A | 0000 | TT | TT | TT  | TT | TT | TT | TT | TT | TT | TT | TT |
| 2A9E_A | 0000 | TT | TT | TT  | TT | TT | TT | TT | TT | TT | TT | TT |
| 1S18_A | 0000 | TT | TT | TT  | TT | TT | TT | TT | TT | TT | TT | TT |
| 1DGH_A | 0000 | TT | TT | TT  | TT | TT | TT | TT | TT | TT | TT | TT |
| 1DGG_A | 0000 | TT | TT | TT  | TT | TT | TT | TT | TT | TT | TT | TT |
| 1QQW_A | 0000 | TT | TT | TT  | TT | TT | TT | TT | TT | TT | TT | TT |
| 1DGH_B | 0000 | TT | TT | TT  | TT | TT | TT | TT | TT | TT | TT | TT |
| 7CAT_A | 0000 | TT | TT | TT  | TT | TT | TT | TT | TT | TT | TT | TT |
| 3NWL_A | 0000 | TT | TT | TT  | TT | TT | TT | TT | TT | TT | TT | TT |
| 3RGP_A | 0000 | TT | TT | TT  | TT | TT | TT | TT | TT | TT | TT | TT |
| 1GWH_A | 0000 | TT | TT | TT  | TT | TT | TT | TT | TT | TT | TT | TT |
| 1HBZ_A | 0000 | TT | TT | TT  | TT | TT | TT | TT | TT | TT | TT | TT |
| 2XQ1_A | 0000 | TT | TT | TT  | TT | TT | TT | TT | TT | TT | TT | TT |
| 1GWF_A | 0000 | TT | TT | TT  | TT | TT | TT | TT | TT | TT | TT | TT |
| 4B7F_A | 0000 | TT | TT | TT  | TT | TT | TT | TT | TT | TT | TT | TT |
| 1A4E_A | 0000 | TT | TT | TT  | TT | TT | TT | TT | TT | TT | TT | TT |
| 1M7S_A | 0000 | TT | TT | TT  | TT | TT | TT | TT | TT | TT | TT | TT |
| 2J2M_A | 0000 | TT | TT | TT  | TT | TT | TT | TT | TT | TT | TT | TT |
| 3P9S_A | 0000 | TT | TT | TT  | TT | TT | TT | TT | TT | TT | TT | TT |
| 3P9R_A | 0000 | TT | TT | TT  | TT | TT | TT | TT | TT | TT | TT | TT |
| 3TTV_A | 0000 | TT | TT | TT  | TT | TT | TT | TT | TT | TT | TT | TT |
| 4ENV_A | 0000 | TT | TT | TT  | TT | TT | TT | TT | TT | TT | TT | TT |
| 1QF7_A | 0000 | TT | TT | TT  | TT | TT | TT | TT | TT | TT | TT | TT |
| 3P9P_A | 0000 | TT | TT | TT  | TT | TT | TT | TT | TT | TT | TT | TT |
| 4ENT_A | 0000 | TT | TT | TT  | TT | TT | TT | TT | TT | TT | TT | TT |
| 1IPH_A | 0000 | TT | TT | TT  | TT | TT | TT | TT | TT | TT | TT | TT |
| 4ENW_A | 0000 | TT | TT | TT  | TT | TT | TT | TT | TT | TT | TT | TT |
| 4ENU_A | 0000 | TT | TT | TT  | TT | TT | TT | TT | TT | TT | TT | TT |
| 4ENS_A | 0000 | TT | TT | TT  | TT | TT | TT | TT | TT | TT | TT | TT |
| 3TTT_A | 0000 | TT | TT | TT  | TT | TT | TT | TT | TT | TT | TT | TT |
| 4ENQ_A | 0000 | TT | TT | TT  | TT | TT | TT | TT | TT | TT | TT | TT |
| 1CF9_A | 0000 | TT | TT | TT  | TT | TT | TT | TT | TT | TT | TT | TT |
| 1QWS_A | 0000 | TT | TT | TT  | TT | TT | TT | TT | TT | TT | TT | TT |
| 1P81_A | 0000 | TT | TT | TT  | TT | TT | TT | TT | TT | TT | TT | TT |
| 1GGK_A | 0000 | TT | TT | TT  | TT | TT | TT | TT | TT | TT | TT | TT |
| 4ENP_A | 0000 | TT | TT | TT  | TT | TT | TT | TT | TT | TT | TT | TT |
| 1P7Z_A | 0000 | TT | TT | TT  | TT | TT | TT | TT | TT | TT | TT | TT |
| 1P80_A | 0000 | TT | TT | TT  | TT | TT | TT | TT | TT | TT | TT | TT |
| 1GG9_A | 0000 | TT | TT | TT  | TT | TT | TT | TT | TT | TT | TT | TT |
| 1GGJ_A | 0000 | TT | TT | TT  | TT | TT | TT | TT | TT | TT | TT | TT |
| 4ENR_A | 0000 | TT | TT | TT  | TT | TT | TT | TT | TT | TT | TT | TT |
| 1P7Y_A | 0000 | TT | TT | TT  | TT | TT | TT | TT | TT | TT | TT | TT |
| 3P9Q_A | 0000 | TT | TT | TT  | TT | TT | TT | TT | TT | TT | TT | TT |
| 3TTX_A | 0000 | TT | TT | TT  | TT | TT | TT | TT | TT | TT | TT | TT |
| 3TTW_A | 0000 | TT | TT | TT  | TT | TT | TT | TT | TT | TT | TT | TT |
| 1GGH_A | 0000 | TT | TT | TT  | TT | TT | TT | TT | TT | TT | TT | TT |
| 3TTU_A | 0000 | TT | TT | TT  | TT | TT | TT | TT | TT | TT | TT | TT |
| 4AUE_A | 0000 | TT | TT | TT  | TT | TT | TT | TT | TT | TT | TT | TT |
| 4AUM_A | 0000 | TT | TT | TT  | TT | TT | TT | TT | TT | TT | TT | TT |
| 4B2Y_A | 0000 | TT | TT | TT  | TT | TT | TT | TT | TT | TT | TT | TT |
| 4B5K_A | 0000 | TT | TT | TT  | TT | TT | TT | TT | TT | TT | TT | TT |
| 4B40_A | 0000 | TT | TT | TT  | TT | TT | TT | TT | TT | TT | TT | TT |
| 4AUN_A | 0000 | TT | TT | TT  | TT | TT | TT | TT | TT | TT | TT | TT |
| 4AUL_A | 0000 | TT | TT | TT  | TT | TT | TT | TT | TT | TT | TT | TT |
| 4B31_A | 0000 | TT | TT | TT  | TT | TT | TT | TT | TT | TT | TT | TT |
| 1S7Y_A | 0000 | TT | TT | TT  | TT | TT | TT | TT | TT | TT | TT | TT |
| 2XF2_A | 0000 | TT | TT | TT  | TT | TT | TT | TT | TT | TT | TT | TT |
| 2IUF_A | 0000 | TT | TT | TT  | TT | TT | TT | TT | TT | TT | TT | TT |
| 3EJ7_A | 0000 | TT | TT | TT  | TT | TT | TT | TT | TT | TT | TT | TT |
| 4A79_A | 0000 | TT | TT | TT  | TT | TT | TT | TT | TT | TT | TT | TT |
| 4B1M_A | 0000 | TT | TT | TT  | TT | TT | TT | TT | TT | TT | TT | TT |
| 1YE9_A | 0000 | TT | TT | TT  | TT | TT | TT | TT | TT | TT | TT | TT |
| 1YE9_E | 0000 | TT | TT | TT  | TT | TT | TT | TT | TT | TT | TT | TT |
| 3E4W_A | 0000 | TT | TT | TT  | TT | TT | TT | TT | TT | TT | TT | TT |

acc hyd 2CAH\_A AAAAAAAAA A : A A AA : # : AA : AA A A AAAAAAAAAA A A AA AAAAAA AA AAAA A
